# Supplementary material
Source: PubMed Central journal article supplement (PMC9881463)

Supplementary Figure 1

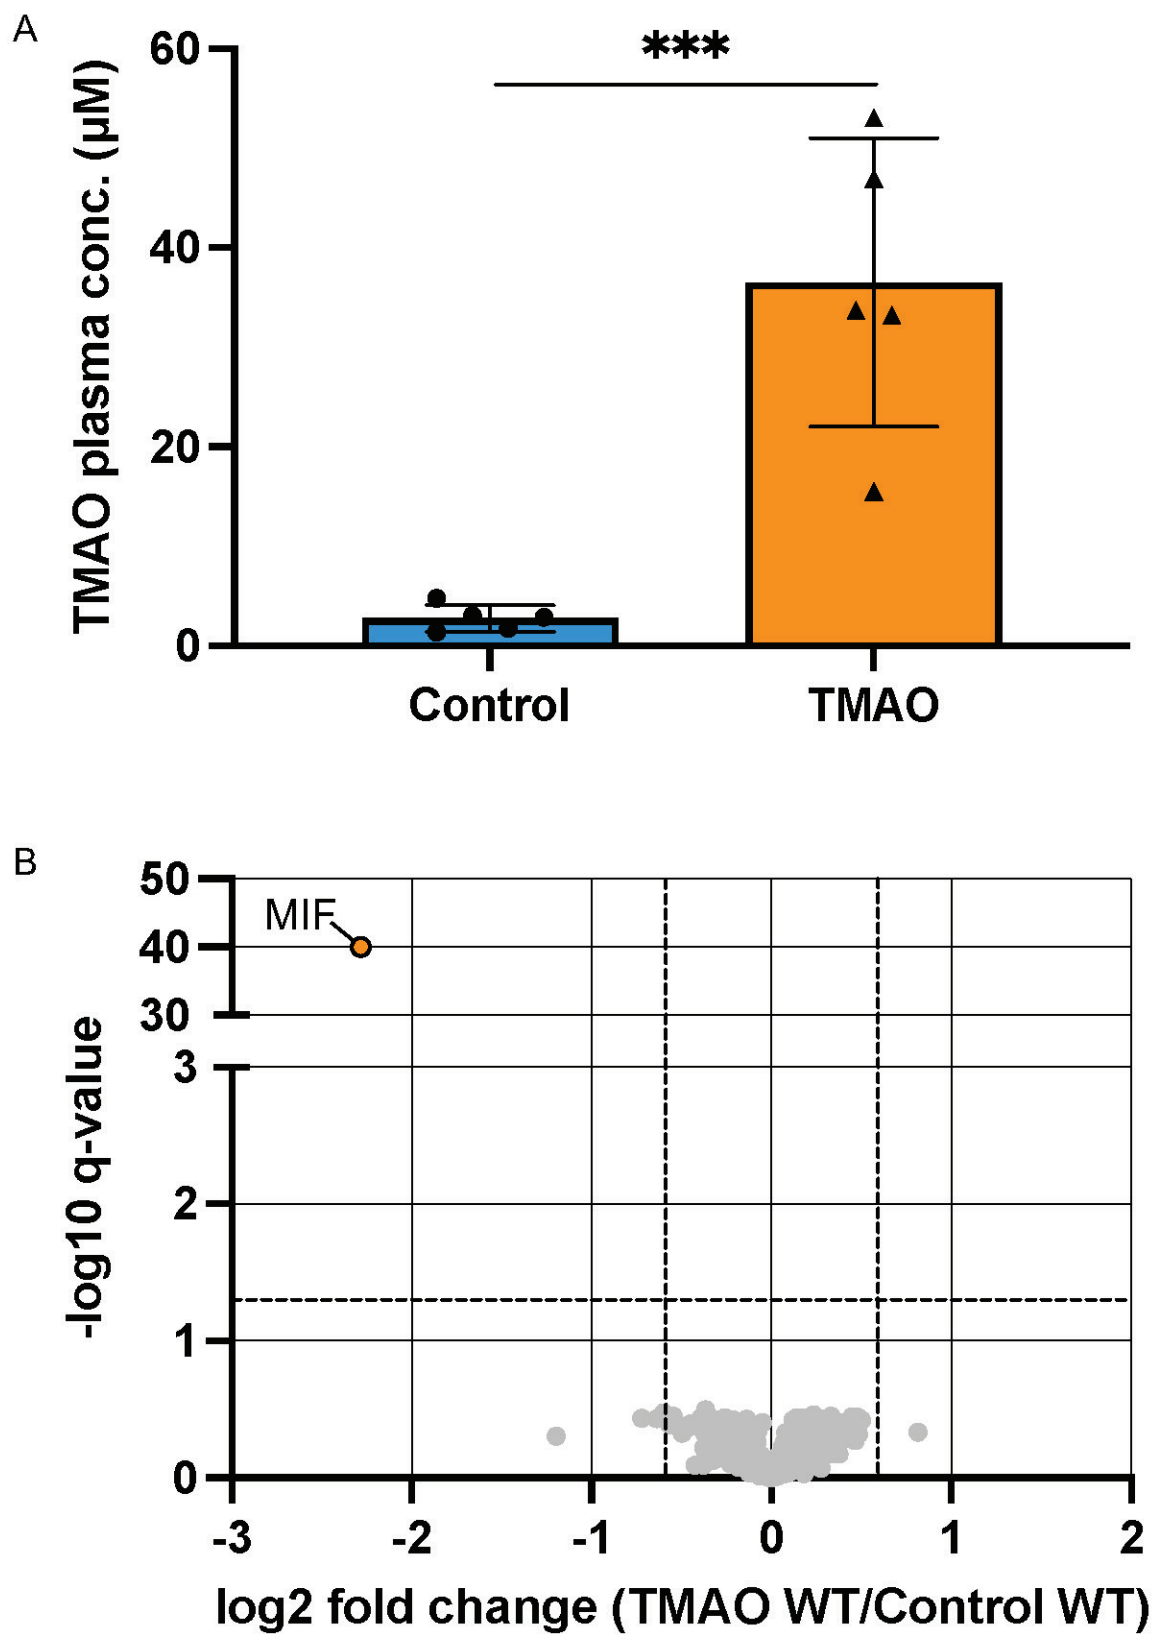

# Supplementary Figure 2

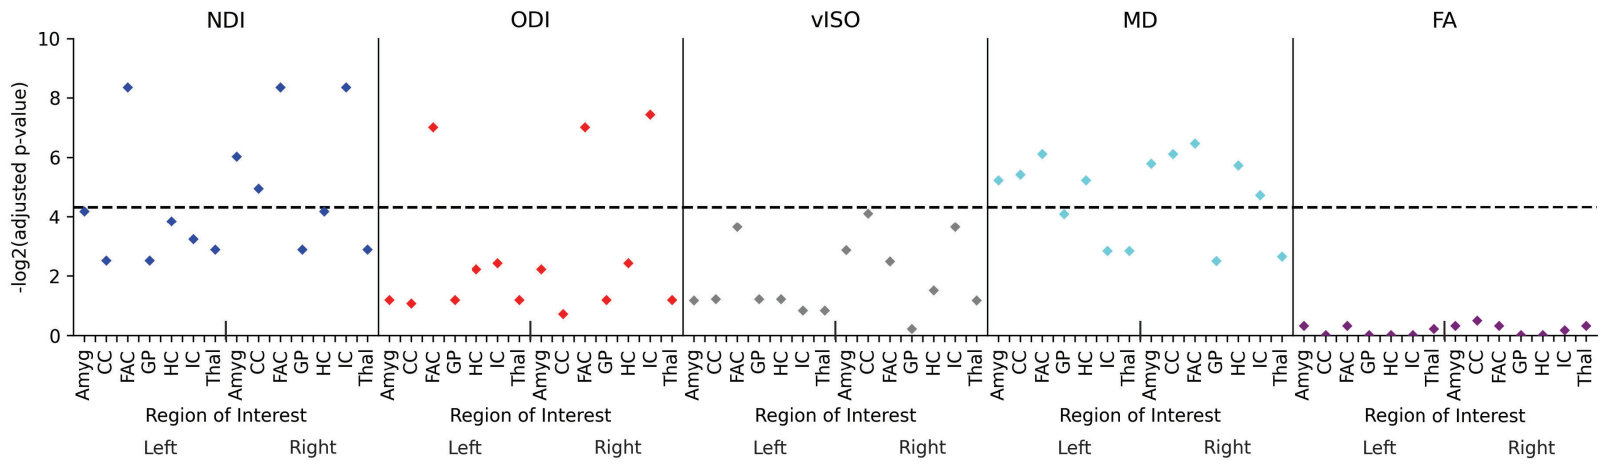

Supplementary Figure 3

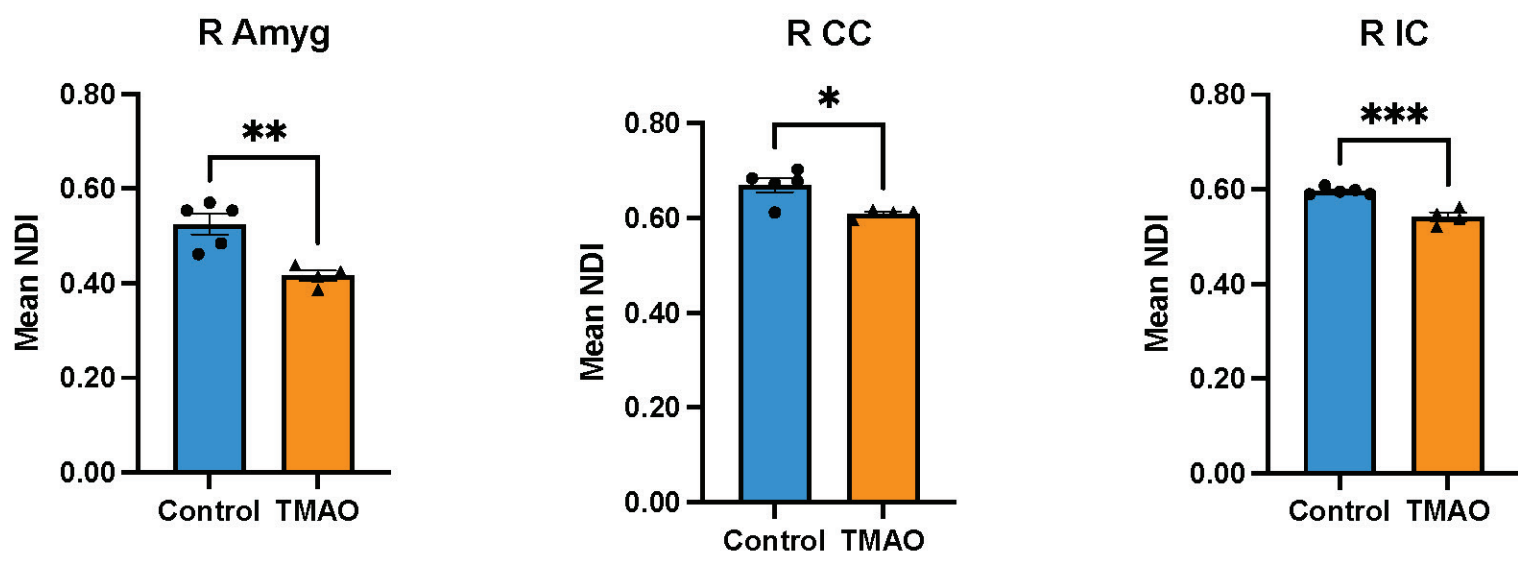

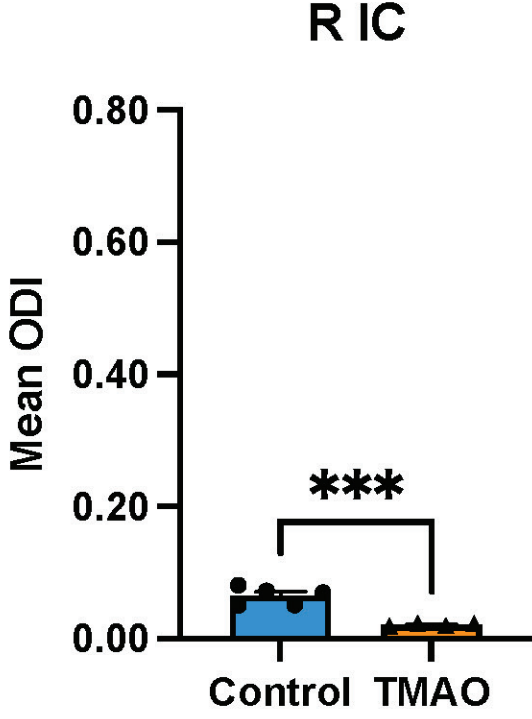

# Supplementary Figure 5

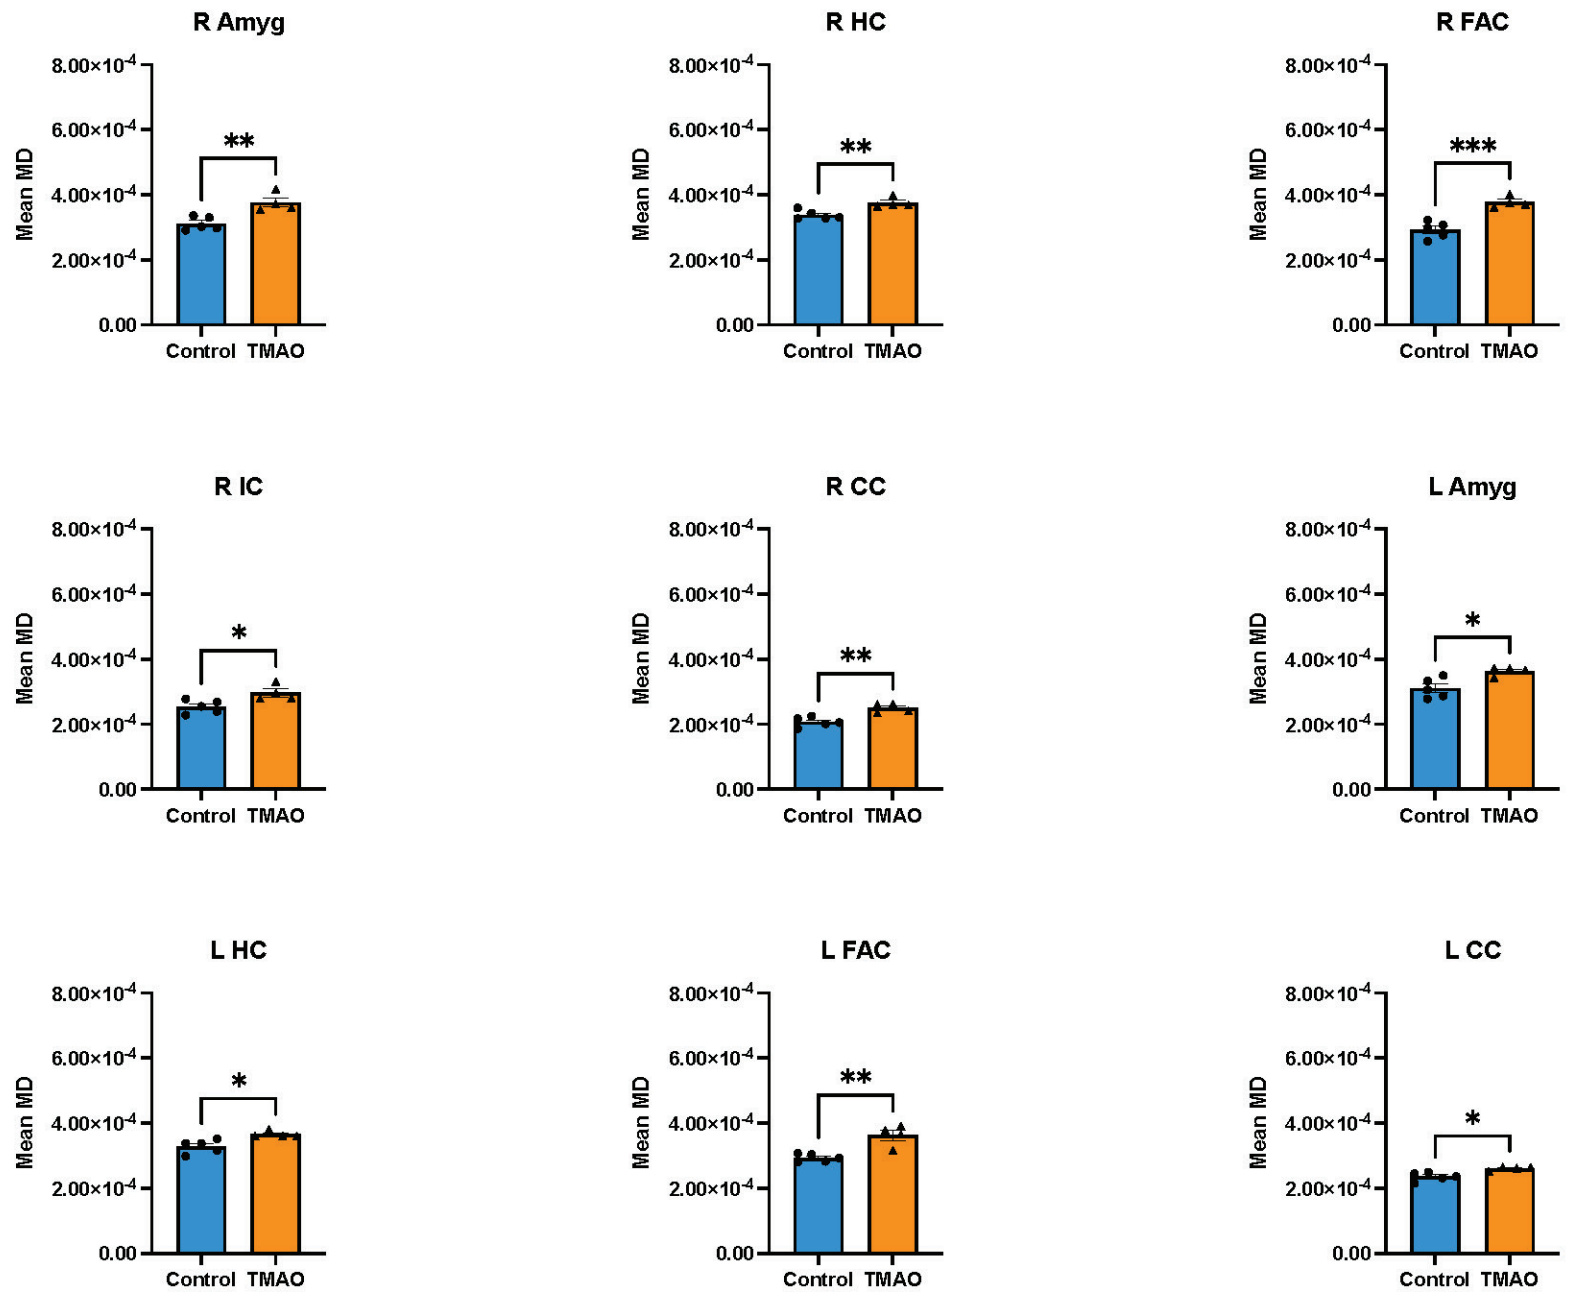

# Supplementary Figure 6

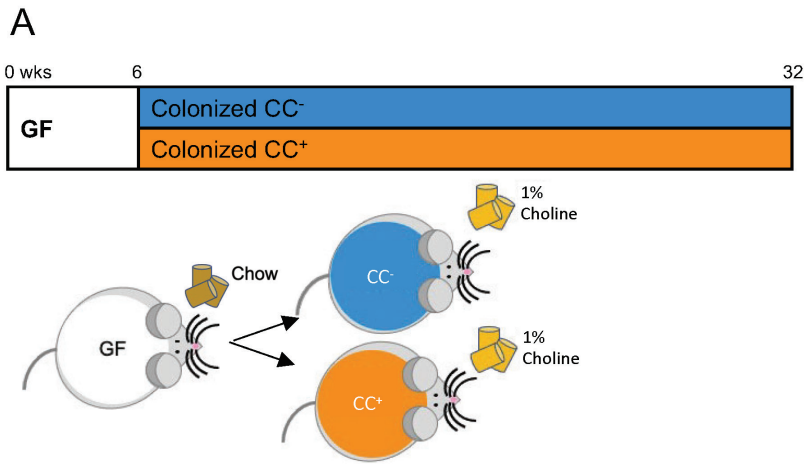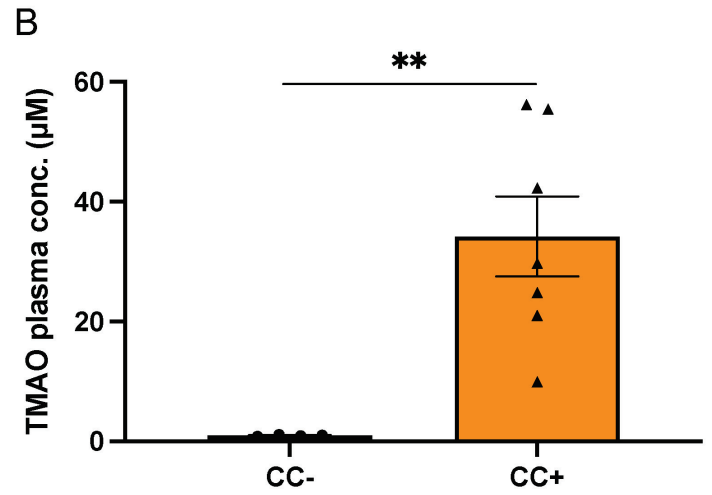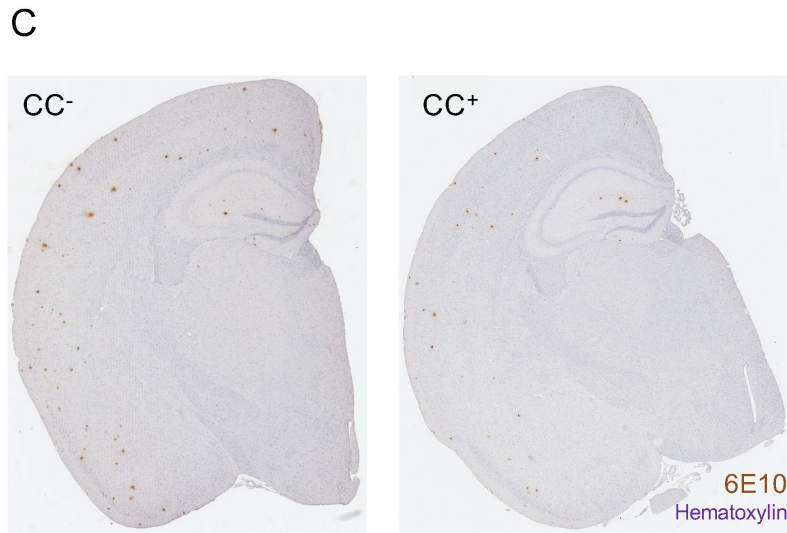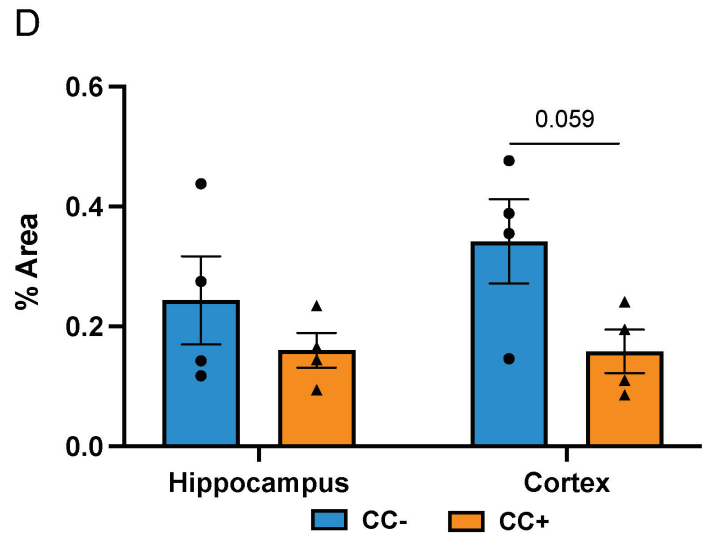

Supplement: NIHMS1860955-supplement-Supplementary_Figures.pdf [file NIHMS1860955-supplement-Supplementary_Figures.pdf]
